# Supplementary material for: Effects of Modified Magnetite Nanoparticles on Bacterial Cells and Enzyme Reactions
Source: MDPI journal article supplement (doi:10.3390/nano10081499), 2020-07-30
Supplement: s1 [file s1]

**Table S3.** Statistics of relative bioluminescence intensity of enzyme system in 1,4-benzoquinone solution (Figure 9)

| Samples                                                                   | p                          |                     |
|---------------------------------------------------------------------------|----------------------------|---------------------|
|                                                                           | Concentrations             |                     |
| Fe <sub>3</sub> O <sub>4</sub>                                            | 0.0001                     |                     |
| Fe <sub>3</sub> O <sub>4</sub> /APTES                                     | 0.0001                     |                     |
| Fe <sub>3</sub> O <sub>4</sub> /HA                                        | 0.001                      |                     |
|                                                                           | Comparison by sample pairs |                     |
|                                                                           | Concentration≤5E-06        | Concentration>5E-06 |
| Fe <sub>3</sub> O <sub>4</sub> /APTES- Fe <sub>3</sub> O <sub>4</sub>     | 0.01                       | >0.05               |
| Fe <sub>3</sub> O <sub>4</sub> /HA- Fe <sub>3</sub> O <sub>4</sub>        | >0.05                      | 0.001               |
| Fe <sub>3</sub> O <sub>4</sub> /HA- Fe <sub>3</sub> O <sub>4</sub> /APTES | 0.01                       | 0.001               |

| Bioactivity in relation to control:                   |                     |         |         |         |        |        |        |        |        |        |        |        |        |
|-------------------------------------------------------|---------------------|---------|---------|---------|--------|--------|--------|--------|--------|--------|--------|--------|--------|
| Samples                                               | Concentraions, mg/L |         |         |         |        |        |        |        |        |        |        |        |        |
| Fe <sub>3</sub> O <sub>4</sub> -<br>control           | 4.7E-12             | 4.7E-11 | 4.7E-10 | 4.7E-9  | 4.7E-8 | 4.7E-7 | 4.7E-6 | 4.7E-5 | 4.7E-4 | 4.7E-3 | 4.7E-2 | 4.7E-1 | 4.7E+0 |
|                                                       | >0.05               | >0.05   | >0.05   | >0.05   | >0.05  | >0.05  | >0.05  | >0.05  | >0.05  | >0.05  | >0.05  | 0.0001 | 0.0001 |
|                                                       | 0.05                |         |         |         |        |        |        |        |        |        |        |        |        |
| Fe <sub>3</sub> O <sub>4</sub> /<br>APTES-<br>control | 1.1E-12             | 1.1E-11 | 1.1E-10 | 1.1E-9  | 1.1E-8 | 1.1E-7 | 1.1E-6 | 1.1E-5 | 1.1E-4 | 1.1E-3 | 1.1E-2 | 1.1E-1 | 1.1E+0 |
|                                                       | >0.05               | >0.05   | >0.05   | >0.05   | >0.05  | >0.05  | >0.05  | >0.05  | >0.05  | 0.01   | 0.01   | >0.05  | 0.0001 |
|                                                       | 0.05                |         |         |         |        |        |        |        |        |        |        |        |        |
| Fe <sub>3</sub> O <sub>4</sub> /<br>HA-<br>control    | 4.9E-13             | 4.9E-12 | 4.9E-11 | 4.9E-10 | 4.9E-9 | 4.9E-8 | 4.9E-7 | 4.9E-6 | 4.9E-5 | 4.9E-3 | 4.9E-2 | 4.9E-1 | 4.9E+0 |
|                                                       | >0.05               | >0.05   | >0.05   | >0.05   | 0.01   | >0.05  | >0.05  | 0.01   | 0.01   | 0.001  | 0.0001 | 0.0001 | 0.0001 |
|                                                       | 0.01                |         |         |         |        |        |        |        |        |        |        |        |        |
