# Supplementary material for: Effects of Modified Magnetite Nanoparticles on Bacterial Cells and Enzyme Reactions
Source: MDPI journal article supplement (doi:10.3390/nano10081499), 2020-07-30
Supplement: s1 [file s1]

**Table S2.** Statistics of relative enzyme bioluminescence intensity (Figure 7)

| Samples                                                                   |         | P                          |         |         |         |        |        |        |        |        |        |        |        |        |
|---------------------------------------------------------------------------|---------|----------------------------|---------|---------|---------|--------|--------|--------|--------|--------|--------|--------|--------|--------|
|                                                                           |         | Concentrations             |         |         |         |        |        |        |        |        |        |        |        |        |
| Fe <sub>3</sub> O <sub>4</sub>                                            |         | >0.05                      |         |         |         |        |        |        |        |        |        |        |        |        |
| Fe <sub>3</sub> O <sub>4</sub> /APTES                                     |         | 0.001                      |         |         |         |        |        |        |        |        |        |        |        |        |
| Fe <sub>3</sub> O <sub>4</sub> /HA                                        |         | 0.0001                     |         |         |         |        |        |        |        |        |        |        |        |        |
|                                                                           |         | Comparison by sample pairs |         |         |         |        |        |        |        |        |        |        |        |        |
| Fe <sub>3</sub> O <sub>4</sub> /APTES- Fe <sub>3</sub> O <sub>4</sub>     |         | 0.001                      |         |         |         |        |        |        |        |        |        |        |        |        |
| Fe <sub>3</sub> O <sub>4</sub> /HA- Fe <sub>3</sub> O <sub>4</sub>        |         | 0.0001                     |         |         |         |        |        |        |        |        |        |        |        |        |
| Fe <sub>3</sub> O <sub>4</sub> /HA- Fe <sub>3</sub> O <sub>4</sub> /APTES |         | >0.05                      |         |         |         |        |        |        |        |        |        |        |        |        |
| Bioactivity in relation to control:                                       |         |                            |         |         |         |        |        |        |        |        |        |        |        |        |
| Samples                                                                   |         | Concentrations, mg/L       |         |         |         |        |        |        |        |        |        |        |        |        |
| Fe <sub>3</sub> O <sub>4</sub> -<br>control                               | 2.1E-13 | 2.1E-12                    | 2.1E-11 | 2.1E-10 | 2.1E-7  | 2.1E-6 | 2.1E-5 | 2.1E-4 | 2.1E-3 | 2.1E-2 | 2.1E-1 | 2.1E+0 |        |        |
|                                                                           | 0.001   | 0.001                      | 0.0001  | 0.0001  | 0.0001  | 0.0001 | 0.0001 | 0.0001 | 0.0001 | 0.0001 | 0.0001 | 0.0001 |        |        |
| 0.0001                                                                    |         |                            |         |         |         |        |        |        |        |        |        |        |        |        |
| Fe <sub>3</sub> O <sub>4</sub> /<br>APTES-<br>control                     | 6.8E-14 | 6.8E-13                    | 6.8E-12 | 6.8E-11 | 6.8E-10 | 6.8E-8 | 6.8E-7 | 6.8E-6 | 6.8E-5 | 6.8E-4 | 6.8E-3 | 6.8E-2 | 6.8E-1 |        |
|                                                                           | >0.05   | 0.0001                     | 0.0001  | 0.0001  | 0.0001  | 0.001  | >0.05  | 0.0001 | 0.0001 | >0.05  | 0.0001 | 0.001  | 0.0001 |        |
| 0.01                                                                      |         |                            |         |         |         |        |        |        |        |        |        |        |        |        |
| Fe <sub>3</sub> O <sub>4</sub> /<br>HA-<br>control                        | 8.5E-14 | 8.5E-13                    | 8.5E-12 | 8.5E-11 | 8.5E-10 | 8.5E-9 | 8.5E-8 | 8.5E-7 | 8.5E-6 | 8.5E-5 | 8.5E-4 | 8.5E-3 | 8.5E-2 | 8.5E-1 |
|                                                                           | >0.05   | >0.05                      | 0.01    | >0.05   | >0.05   | >0.05  | >0.05  | 0.01   | 0.01   | 0.01   | 0.01   | >0.05  | >0.05  | 0.001  |
| >0.05                                                                     |         |                            |         |         |         |        |        |        |        |        |        |        |        |        |
