# Supplementary material for: Effects of Modified Magnetite Nanoparticles on Bacterial Cells and Enzyme Reactions
Source: MDPI journal article supplement (doi:10.3390/nano10081499), 2020-07-30
Supplement: s1 [file s1]

**Table S7.** Statistic data of fitting by different mathematical models

| <b>Fe<sub>3</sub>O<sub>4</sub></b>       |                            |                           |                           |                                  |                                |
|------------------------------------------|----------------------------|---------------------------|---------------------------|----------------------------------|--------------------------------|
|                                          | <b>Lorenz<br/>function</b> | <b>Gauss<br/>function</b> | <b>Voigt<br/>function</b> | <b>Pseudo-Voigt<br/>function</b> | <b>PearsonVII<br/>function</b> |
| <b>R<sup>2</sup></b>                     | 0.90868                    | 0.90211                   | 0.90956                   | 0.90989                          | 0.90965                        |
| <b>χ<sup>2</sup></b>                     | 11.54172                   | 12.37203                  | 11.43064                  | 11.38935                         | 11.41964                       |
| <b>Fe<sub>3</sub>O<sub>4</sub>/APTES</b> |                            |                           |                           |                                  |                                |
| <b>R<sup>2</sup></b>                     | 0.90834                    | 0.91022                   | 0.91136                   | 0.91105                          | 0.9116                         |
| <b>χ<sup>2</sup></b>                     | 51.12376                   | 50.77037                  | 50.12376                  | 50.3012                          | 49.99087                       |
| <b>Fe<sub>3</sub>O<sub>4</sub>/HA</b>    |                            |                           |                           |                                  |                                |
| <b>R<sup>2</sup></b>                     | 0.93461                    | 0.93082                   | 0.93592                   | 0.93612                          | 0.93606                        |
| <b>χ<sup>2</sup></b>                     | 10.46463                   | 11.07169                  | 10.25538                  | 10.22408                         | 10.2392                        |
