# Supplementary material for: Effects of Modified Magnetite Nanoparticles on Bacterial Cells and Enzyme Reactions
Source: MDPI journal article supplement (doi:10.3390/nano10081499), 2020-07-30
Supplement: s1 [file s1]

**Table S4.** Statistics of relative bacterial bioluminescence intensity (Figure 6)

| Samples                                                                   | p                          |
|---------------------------------------------------------------------------|----------------------------|
|                                                                           | Concentrations             |
| Fe <sub>3</sub> O <sub>4</sub>                                            | >0.05                      |
| Fe <sub>3</sub> O <sub>4</sub> /APTES                                     | >0.05                      |
| Fe <sub>3</sub> O <sub>4</sub> /HA                                        | 0.01                       |
|                                                                           | Comparison by sample pairs |
| Fe <sub>3</sub> O <sub>4</sub> /APTES- Fe <sub>3</sub> O <sub>4</sub>     | 0.01                       |
| Fe <sub>3</sub> O <sub>4</sub> /HA- Fe <sub>3</sub> O <sub>4</sub>        | >0.05                      |
| Fe <sub>3</sub> O <sub>4</sub> /HA- Fe <sub>3</sub> O <sub>4</sub> /APTES | 0.01                       |

**Bioactivity in relation to control:**

| Samples                                               |  | Concentrations, mg/L |        |        |        |        |        |        |        |        |       |       |
|-------------------------------------------------------|--|----------------------|--------|--------|--------|--------|--------|--------|--------|--------|-------|-------|
|                                                       |  | 7.5E-3               |        | 7.5E-2 |        | 7.5E-1 |        | 1.9E+0 |        |        |       |       |
| Fe <sub>3</sub> O <sub>4</sub> -<br>control           |  | 7.5E-3               |        | 7.5E-2 |        | 7.5E-1 |        | 1.9E+0 |        |        |       |       |
|                                                       |  | >0.05                |        | 0.01   |        | 0.01   |        | 0.0001 |        |        |       |       |
| Fe <sub>3</sub> O <sub>4</sub> /<br>APTES-<br>control |  | 0.01                 |        |        |        |        |        |        |        |        |       |       |
|                                                       |  | 1E-3                 |        | 1E-2   |        | 1E-1   |        | 5E-1   |        | 1E+0   |       |       |
|                                                       |  | >0.05                |        | >0.05  |        | >0.05  |        | >0.05  |        | >0.05  |       |       |
|                                                       |  | >0.05                |        |        |        |        |        |        |        |        |       |       |
| Fe <sub>3</sub> O <sub>4</sub> /<br>HA-<br>control    |  | 1E-5                 | 4.6E-5 | 9.3E-5 | 4.6E-4 | 9.3E-4 | 4.6E-3 | 9.3E-3 | 4.6E-2 | 9.3E-2 | 4E-1  | 9E-1  |
|                                                       |  | >0.05                | >0.05  | >0.05  | >0.05  | 0.01   | 0.01   | 0.01   | 0.001  | 0.001  | 0.001 | 0.001 |
|                                                       |  | >0.05                |        |        |        |        |        |        |        |        |       |       |
|                                                       |  | 0.001                |        |        |        |        |        |        |        |        |       |       |
