# Supplementary material for: Effects of Modified Magnetite Nanoparticles on Bacterial Cells and Enzyme Reactions
Source: MDPI journal article supplement (doi:10.3390/nano10081499), 2020-07-30
Supplement: s1 [file s1]

**Table S1.** Statistic data of fitting by different mathematical models for SEM, zeta potential and hydrodynamic size data

| Sample                                | SEM                 |          | Zeta potential      |          | Hydrodynamic size   |          |                   |          |                     |          |
|---------------------------------------|---------------------|----------|---------------------|----------|---------------------|----------|-------------------|----------|---------------------|----------|
|                                       | Lognormal functions |          | Boltzmann functions |          | Lognormal functions |          | Extreme functions |          | Boltzmann functions |          |
|                                       | R <sup>2</sup>      | $\chi^2$ | R <sup>2</sup>      | $\chi^2$ | R <sup>2</sup>      | $\chi^2$ | R <sup>2</sup>    | $\chi^2$ | R <sup>2</sup>      | $\chi^2$ |
| Fe <sub>3</sub> O <sub>4</sub>        | 0.76                | 2.19     | 0.99                | 3.83     | 0.98                | 398.5    | -                 | -        | -                   | -        |
| Fe <sub>3</sub> O <sub>4</sub> /APTES | 0.80                | 0.86     | 0.99                | 3.52     | -                   | -        | 0.85              | 607.9    | -                   | -        |
| Fe <sub>3</sub> O <sub>4</sub> /HA    | 0.73                | 3.16     | 0.92                | 6.80     | -                   | -        | -                 | -        | 0.97                | 172.5    |
