# Supplementary material for: Effects of Modified Magnetite Nanoparticles on Bacterial Cells and Enzyme Reactions
Source: MDPI journal article supplement (doi:10.3390/nano10081499), 2020-07-30
Supplement: s1 [file s1]

**Table S6.** Microstructure of MNPs

| Sample                              | Fe <sub>3</sub> O <sub>4</sub>    |                   |                                 | Fe <sub>3</sub> O <sub>4</sub> /APTES |       |                    | Fe <sub>3</sub> O <sub>4</sub> /HA |       |                    |
|-------------------------------------|-----------------------------------|-------------------|---------------------------------|---------------------------------------|-------|--------------------|------------------------------------|-------|--------------------|
| hkl <sup>1</sup>                    | 2Q, <sup>◦</sup> <sup>2</sup>     | d, Å <sup>3</sup> | FWHM, <sup>◦</sup> <sup>4</sup> | 2Q, <sup>◦</sup>                      | d, Å  | FWHM, <sup>◦</sup> | 2Q, <sup>◦</sup>                   | d, Å  | FWHM, <sup>◦</sup> |
| 220                                 | 45.60                             | 2.971             | 3.877(5)                        | 45.61                                 | 2.959 | 1.790(1)           | 45.67                              | 2.966 | 1.591(2)           |
| 311                                 | 53.98                             | 2.535             | 1.445(2)                        | 54.01                                 | 2.525 | 1.870(1)           | 54.01                              | 2.535 | 1.344(7)           |
| 400                                 | 66.28                             | 2.094             | 2.558(2)                        | 66.41                                 | 2.095 | 2.980(2)           | 66.36                              | 2.094 | 1.401(2)           |
| 422                                 | 84.25                             | 1.714             | 5.912(6)                        | 84.37                                 | 1.711 | 1.870(5)           | 84.25                              | 1.714 | 1.483(2)           |
| 511                                 | 90.77                             | 1.610             | 1.541(2)                        | 90.68                                 | 1.609 | 2.749(5)           | 90.71                              | 1.612 | 1.792(3)           |
| 440                                 | 101.52                            | 1.476             | 2.248(7)                        | 101.6                                 | 1.479 | 0.860(4)           | 101.4                              | 1.476 | 1.591(2)           |
| a, Å <sup>5</sup>                   | 8.383(2)                          |                   |                                 | 8.372(1)                              |       |                    | 8.382(6)                           |       |                    |
| X <sup>6</sup>                      | 0.387(7)                          |                   |                                 | 0.290(3)                              |       |                    | 0.382(1)                           |       |                    |
| δ <sup>7</sup>                      | 0.059(4)                          |                   |                                 | 0.117(2)                              |       |                    | 0.062(7)                           |       |                    |
| Structure                           | Fe <sub>2,94</sub> O <sub>4</sub> |                   |                                 | Fe <sub>2,88</sub> O <sub>4</sub>     |       |                    | Fe <sub>2,93</sub> O <sub>4</sub>  |       |                    |
| D <sub>XRD</sub> , nm <sup>8</sup>  | 6.9±2.4                           |                   |                                 | 9.6±1.4                               |       |                    | 10.3±1.3                           |       |                    |
| CV, % <sup>9</sup>                  | 34                                |                   |                                 | 14.5                                  |       |                    | 12.6                               |       |                    |
| D <sub>SEM</sub> , nm <sup>10</sup> | 32.1±4.3                          |                   |                                 | 24.18±2.8                             |       |                    | 34.75±4.3                          |       |                    |
| CV, %                               | 13.5                              |                   |                                 | 11.6                                  |       |                    | 12.45                              |       |                    |

<sup>1</sup> hkl – Miller indexes.<sup>2</sup> Q – angle at which the reflex was measured.<sup>3</sup> d – interplanar distance.<sup>4</sup> FWHM – full width at half maximum of XRD reflex.<sup>5</sup> a – interplanar distance.<sup>6</sup> X – the Fe<sup>2+</sup>/Fe<sup>3+</sup> ratio.<sup>7</sup> δ – calculated value, which range from zero (stoichiometric magnetite) to 1/3 (completely oxidized).<sup>8</sup> D<sub>XRD</sub> – average particle size calculated by the Scherrer equation ± standard deviation.<sup>9</sup> CV – coefficient of variation characterizing the polydispersity of the system.<sup>10</sup> D<sub>SEM</sub> – average particle size calculated by the SEM ± standard deviation.
